# Supplementary material for: Green corrosion inhibitors for aluminium and its alloys: a review
Source: Royal Society of Chemistry journal article supplement (doi:10.1039/c7ra03944a), 2017-01-01
Supplement: c7ra03944a1.pdf [file c7ra03944a1.pdf]

SUPPLEMENTARY INFORMATION

Table S1: Chemical composition (in wt. %) of the studied alloys as reported by the authors

| Designation | Si        | Fe      | Cu        | Mn      | Mg        | Cr        | Zn      | Ti      | Ga   | Ni      | Zr     | V       | C    | Ca     | Pb      | Ag      | Li      | Be      | Na     | Sr      | In | Other  | Al      | Reference     |
|-------------|-----------|---------|-----------|---------|-----------|-----------|---------|---------|------|---------|--------|---------|------|--------|---------|---------|---------|---------|--------|---------|----|--------|---------|---------------|
| -           | 0.03      | -       | 0.02      | -       | 0.03      | -         | 0.01    | -       | -    | -       | -      | -       | -    | -      | -       | -       | -       | -       | -      | -       | -  | -      | 99.89   | 43            |
| -           | 0.842     | 0.898   | 0.028     | 0.081   | 0.026     | 0.006     | 0.010   | 0.015   | -    | 0.003   | -      | 0.009   | -    | -      | -       | -       | -       | -       | -      | -       | -  | -      | Balance | 147           |
| -           | 0.1350    | 0.4995  | 0.0020    | 0.0120  | 0.0076    | 0.0097    | 0.0057  | -       | -    | 0.0038  | -      | 0.0055  | -    | -      | 0.00269 | -       | -       | -       | -      | -       | -  | 0.0048 | Balance | 113           |
| -           | -         | -       | -         | -       | -         | -         | -       | -       | 0.1  | -       | -      | -       | -    | -      | 1.5     | -       | -       | -       | -      | -       | -  | 1.0    | Balance | 72            |
| -           | 0.135     | 0.171   | 0.001     | 0.001   | -         | -         | 0.001   | 0.003   | -    | 0.001   | -      | -       | -    | -      | -       | -       | -       | -       | -      | -       | -  | -      | 99.687  | 79            |
| -           | 0.45588   | 0.75993 | 0.06855   | 0.11625 | 0.01998   | 0.00548   | 0.05275 | 0.01586 | -    | 0.00441 | -      | 0.00668 | -    | -      | 0.02079 | -       | -       | -       | -      | -       | -  | -      | 98.4734 | 86            |
| -           | 9         | -       | -         | -       | -         | -         | -       | -       | -    | -       | -      | -       | -    | -      | -       | -       | -       | -       | -      | -       | -  | -      | 91      | 177           |
| -           | 0.77      | 0.93    | 0.02      | 0.11    | 0.01      | 0.05      | 0.01    | 0.02    | 0.01 | -       | -      | 0.01    | -    | -      | -       | -       | -       | -       | -      | -       | -  | -      | Balance | 64, 90, 96    |
| -           | 2.242     | 0.765   | -         | 0.009   | -         | 0.009     | 1.621   | -       | -    | 0.043   | -      | -       | -    | -      | 0.014   | -       | -       | -       | -      | -       | -  | -      | Balance | 16            |
| -           | 0.459     | 0.190   | 0.0059    | 0.0094  | 0.511     | 0.0022    | 0.0084  | 0.010   | -    | -       | -      | -       | -    | -      | 0.0008  | -       | -       | -       | -      | -       | -  | -      | 98.8    | 75            |
| -           | 0.95      | 0.25    | 0.05      | 0.40    | 0.66      | 0.04      | 0.04    | 0.03    | -    | -       | -      | -       | -    | -      | -       | -       | -       | -       | -      | -       | -  | -      | Balance | 117           |
| -           | 0.01      | -       | -         | 1.26    | -         | -         | -       | -       | -    | -       | -      | -       | 0.08 | -      | -       | -       | -       | -       | -      | -       | -  | 0.02   | Balance | 80            |
| -           | 0.157     | 0.281   | -         | 0.025   | 0.5       | -         | -       | 0.0046  | -    | -       | -      | -       | -    | 0.0012 | -       | -       | -       | -       | 0.001  | 0.0001  | -  | 0.0164 | 99.01   | 164, 171      |
| -           | 0.157     | 0.282   | 0.0025    | 0.024   | 0.51      | 0.023     | <0.0010 | 0.0049  | -    | <0.0010 | 0.0020 | 0.0035  | -    | 0.0011 | <0.0005 | <0.0001 | <0.0002 | <0.0001 | 0.0005 | <0.0001 | -  | 0.0035 | 99      | 101, 106, 107 |
| -           | 0.40      | 0.7     | 0.15      | 0.15    | 0.80      | 0.04      | 0.25    | 0.15    | -    | -       | -      | -       | -    | -      | -       | -       | -       | -       | -      | -       | -  | -      | Balance | 174           |
| -           | 0.25      | 0.35    | 0.05      | 0.03    | 0.03      | -         | 0.05    | 0.03    | -    | -       | -      | 0.05    | -    | -      | -       | -       | -       | -       | -      | -       | -  | -      | Balance | 47            |
| -           | 0.3–0.7   | 0.6     | 0.1       | 0.3     | 0.4–0.9   | 0.2       | 0.2     | -       | -    | -       | -      | -       | -    | -      | -       | -       | -       | -       | -      | -       | -  | 0.1    | Balance | 123, 124      |
| -           | 0.381     | 0.57    | 0.81      | 1.28    | -         | -         | 0.006   | 0.029   | -    | -       | -      | -       | -    | -      | 0.064   | -       | -       | -       | -      | -       | -  | -      | 96.65   | 150-153       |
| -           | 0.362     | 0.549   | 0.077     | 1.219   | -         | -         | 0.004   | 0.026   | -    | -       | -      | -       | -    | -      | 0.063   | -       | -       | -       | -      | -       | -  | -      | Balance | 60, 93        |
| -           | 0.06      | 0.08    | 0.001     | -       | -         | -         | -       | -       | -    | -       | -      | -       | -    | -      | -       | -       | -       | -       | -      | -       | -  | -      | 99.85   | 165, 167-169  |
| -           | 0.144     | 0.498   | 0.007     | 0.031   | 0.005     | -         | 0.001   | -       | -    | -       | -      | -       | -    | -      | -       | -       | -       | -       | -      | -       | -  | -      | 99.2    | 57            |
| -           | -         | -       | -         | 0.6     | -         | -         | -       | -       | -    | -       | -      | -       | 0.15 | -      | -       | -       | -       | -       | -      | -       | -  | 0.43   | 98.79   | 54            |
| -           | 0.381     | 0.57    | 0.81      | 1.28    | -         | -         | 0.006   | 0.029   | -    | -       | -      | -       | -    | -      | 0.064   | -       | -       | -       | -      | -       | -  | -      | 96.65   | 157           |
| -           | 0.12      | 0.27    | -         | -       | -         | -         | -       | -       | -    | -       | -      | -       | -    | -      | -       | -       | -       | -       | -      | -       | -  | -      | 99.61   | 76            |
| -           | 0.100     | 0.250   | -         | 0.047   | 0.007     | 0.008     | 0.003   | -       | -    | 0.004   | -      | -       | -    | -      | -       | -       | -       | -       | 0.001  | -       | -  | -      | 99.550  | 41            |
| -           | 7.030     | 0.100   | -         | 0.369   | 0.369     | 0.001     | 0.003   | -       | -    | 0.002   | -      | -       | -    | -      | -       | -       | -       | -       | 0.003  | -       | -  | -      | 92.482  | 41            |
| AA1060      | 0.25      | 0.35    | 0.05      | 0.03    | 0.03      | -         | 0.05    | 0.03    | -    | -       | -      | 0.05    | -    | -      | -       | -       | -       | -       | -      | -       | -  | -      | Balance | 50            |
| AA1100      | 0.65      | 1.18    | 0.042     | -       | 0.0051    | -         | 3.60    | 0.111   | -    | 0.015   | -      | 0.0035  | -    | -      | 0.012   | -       | -       | <0.0001 | -      | 0.317   | -  | <0.011 | 94.10   | 99            |
| AA2024      | 0.06      | 0.17    | 4.5       | 0.63    | 1.51      | 0.01      | 0.08    | 0.03    | -    | -       | -      | -       | -    | -      | -       | -       | -       | -       | -      | -       | -  | -      | Balance | 11, 102       |
| AA3001      | 0.381     | 0.57    | 0.81      | 1.28    | -         | -         | 0.006   | 0.029   | -    | -       | -      | -       | -    | -      | 0.064   | -       | -       | -       | -      | -       | -  | -      | 96.65   | 149           |
| AA3003      | 0.362     | 0.54    | 0.077     | 1.219   | -         | -         | 0.004   | 0.026   | -    | -       | -      | -       | -    | -      | 0.063   | -       | -       | -       | -      | -       | -  | -      | Balance | 87, 88        |
| AA3003      | 0.363     | 0.55    | 0.077     | 1.22    | -         | -         | -       | 0.026   | -    | -       | -      | 0.009   | -    | -      | 0.064   | -       | -       | -       | -      | -       | -  | 0.019  | 97.672  | 104           |
| AA5052      | -         | -       | -         | -       | 2.50      | 0.25      | -       | -       | -    | -       | -      | -       | -    | -      | -       | -       | -       | -       | -      | -       | -  | -      | 97.20   | 175           |
| AA5754      | 0.40      | 0.40    | 0.10      | 0.50    | 3.10      | 0.30      | 0.20    | 0.15    | -    | -       | -      | -       | -    | -      | -       | -       | -       | -       | -      | -       | -  | -      | 94.85   | 165, 169      |
| AA6061      | 0.40-0.80 | 0.70    | 0.15-0.40 | 0.15    | 0.80-1.20 | 0.04-0.35 | 0.25    | 0.15    | -    | -       | -      | -       | -    | -      | -       | -       | -       | -       | -      | -       | -  | 0.15   | Balance | 178           |
| AA6063      | 0.4830    | 0.1799  | 0.0008    | 0.0083  | 0.4051    | 0.0040    | 0.0165  | 0.0145  | -    | 0.0047  | -      | -       | -    | -      | -       | -       | -       | -       | -      | -       | -  | -      | 98.83   | 12            |
| AA6063      | 0.42      | 0.17    | 0.001     | 0.009   | 0.42      | -         | 0.001   | 0.010   | -    | 0.001   | -      | -       | -    | -      | -       | -       | -       | -       | 0.0012 | -       | -  | -      | Balance | 125, 176      |
| AA6063      | 0.157     | 0.281   | -         | 0.025   | 0.5       | -         | -       | 0.0046  | -    | -       | -      | -       | -    | 0.0012 | -       | -       | -       | -       | 0.001  | 0.0001  | -  | 0.0164 | 99.01   | 166           |
| AA7075      | 0.41      | 0.50    | 1.38      | ≤ 0.30  | 2.62      | -         | 5.89    | ≤ 0.20  | -    | -       | -      | -       | -    | -      | -       | -       | -       | -       | -      | -       | -  | -      | Balance | 42            |
| AA7075      | 0.08      | 0.23    | 1.59      | 0.01    | 2.62      | 0.19      | 5.81    | 0.02    | -    | -       | -      | -       | -    | -      | -       | -       | -       | -       | -      | -       | -  | -      | Balance | 78            |
| AA7075-T6   | 0.40      | 0.48    | 1.98      | 0.14    | 2.60      | 0.18      | 5.50    | -       | -    | -       | -      | -       | -    | -      | -       | -       | -       | -       | -      | -       | -  | -      | Balance | 77            |
| AA8011      | 0.240     | 0.241   | 0.035     | 0.102   | -         | -         | 0.043   | 0.019   | -    | -       | -      | -       | -    | -      | 0.014   | -       | -       | -       | -      | -       | -  | -      | Balance | 98, 100       |
| 2S (1200)   | 0.30      | 0.60    | -         | 0.05    | -         | -         | -       | -       | -    | -       | -      | -       | -    | -      | -       | -       | -       | -       | -      | -       | -  | -      | Balance | 45            |
| 3SR         | 0.2285    | 0.5783  | 0.809     | 0.2732  | 0.0273    | 0.0057    | 0.1029  | 0.0125  | -    | 0.0055  | -      | 0.0051  | -    | -      | 0.0766  | -       | -       | -       | -      | -       | -  | -      | 98.60   | 83, 84        |
| 3SR         | 0.20960   | -       | 0.003443  | 0.10245 | 0.01191   | 0.00780   | 0.01520 | -       | -    | 0.00292 | -      | 0.00422 | -    | -      | 0.02521 | -       | -       | -       | -      | -       | -  | -      | 98.7577 | 115           |

|                         |        |        |        |        |        |        |        |        |   |       |   |        |   |   |        |   |   |   |        |       |   |         |          |
|-------------------------|--------|--------|--------|--------|--------|--------|--------|--------|---|-------|---|--------|---|---|--------|---|---|---|--------|-------|---|---------|----------|
| Al 3SR                  | 0.2885 | 0.5783 | 0.0809 | 0.2732 | 0.0273 | 0.0057 | 0.1029 | 0.0125 | - | -     | - | 0.0051 | - | - | 0.0766 | - | - | - | -      | -     | - | 98.60   | 40       |
| 32177                   | 1.06   | 0.33   | 0.070  | 0.62   | 0.75   | 0.007  | 0.020  | 0.055  | - | -     | - | -      | - | - | -      | - | - | - | -      | -     | - | Balance | 63       |
| Al-3Mg                  | 0.25   | 0.40   | 0.10   | 0.10   | 3.10   | 0.15   | 0.20   | 0.20   | - | -     | - | -      | - | - | -      | - | - | - | -      | -     | - | Balance | 170      |
| AA20556                 | 7.01   | 0.110  | -      | -      | 0.318  | -      | 0.001  | 0.091  | - | 0.001 | - | -      | - | - | -      | - | - | - | 0.0012 | -     | - | Balance | 125, 176 |
| AlSi <sub>11</sub> MgSr | 10.85  | 0.110  | -      | 0.001  | 0.176  |        | 0.001  | 0.094  |   | 0.001 | - | -      | - | - | -      | - | - | - | 0.0016 | 0.061 | - | Balance | 125      |
